# Supplementary material
Source: PubMed Central journal article supplement (PMC3837736)
Supplement: AEM.02649-13_zam999104915so1.pdf [file AEM.02649-13_zam999104915so1.pdf]

## Supplementary Data

### Dynamics of the yeast transcriptome during bread dough fermentation

Elham Aslankoohi<sup>1,2</sup>, Bo Zhu<sup>1,2</sup>, Mohammad Naser Rezaei<sup>3</sup>, Karin Voordeckers<sup>1,2</sup>, Dries De Maeyer<sup>4</sup>, Kathleen Marchal<sup>4</sup>, Emmie Dornez<sup>3</sup>, Christophe M. Courtin<sup>3,5</sup> and Kevin J. Verstrepen<sup>1,2,5</sup>

<sup>1</sup> VIB Laboratory of Systems Biology, Gaston Geenslaan 1, B-3001 Leuven, Belgium

<sup>2</sup> CMPG Laboratory of Genetics and Genomics, KU Leuven, Gaston Geenslaan 1, B-3001 Leuven, Belgium

<sup>3</sup> Laboratory of Food Chemistry and Biochemistry & Leuven Food Science and Nutrition Research Centre (LFoRCe), KU Leuven, Kasteelpark Arenberg 20, B-3001 Leuven, Belgium

<sup>4</sup> Center of Microbial and Plant Genetics, KU Leuven, Kasteelpark Arenberg 20, B-3001 Leuven, Belgium

<sup>5</sup> Corresponding authors:

[Christophe.Courtin@biw.kuleuven.be](mailto:Christophe.Courtin@biw.kuleuven.be)

[Kevin.Verstrepen@biw.vib-kuleuven.be](mailto:Kevin.Verstrepen@biw.vib-kuleuven.be)

Figure S1 and Tables S1, S2

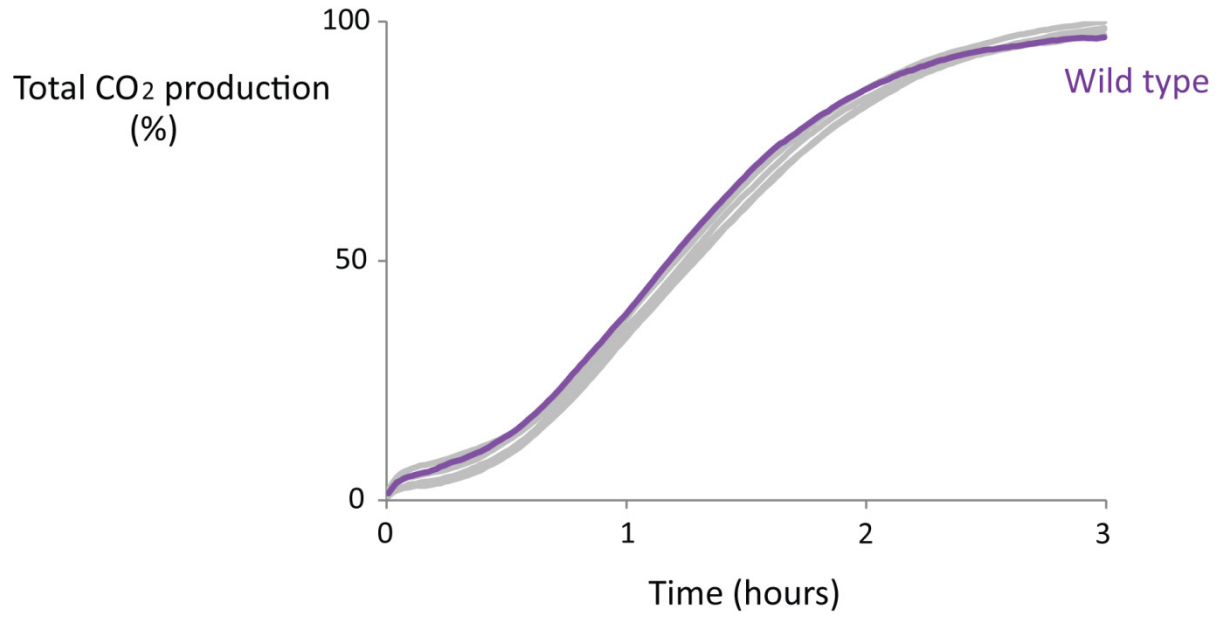

**Fig. S1:** None of the mutants showed differences in activity compared to the wild type during fermentation of standard rich medium (YPD). Shown is the CO<sub>2</sub> production during dough fermentation, which serves as a proxy for the fermentation efficiency.

**Table S1:** Top 50 Gene Ontology terms for transiently up (cluster 2 and 3 figure 3) and down regulated (cluster 5 and 6 figure 3) genes in all three strains.

| 2728                                                                                                 |          | 2730                                                                                                 |          | 2930                                                                                                 |          |
|------------------------------------------------------------------------------------------------------|----------|------------------------------------------------------------------------------------------------------|----------|------------------------------------------------------------------------------------------------------|----------|
| GO Term                                                                                              | FDR      | GO Term                                                                                              | FDR      | GO Term                                                                                              | FDR      |
| <b>Transiently up-regulated</b>                                                                      |          |                                                                                                      |          |                                                                                                      |          |
| GO:0042254~ribosome biogenesis                                                                       | 1.48E-86 | GO:0042254~ribosome biogenesis                                                                       | 1.24E-90 | GO:0042254~ribosome biogenesis                                                                       | 2.2E-99  |
| GO:0022613~ribonucleoprotein complex biogenesis                                                      | 4.62E-82 | GO:0022613~ribonucleoprotein complex biogenesis                                                      | 1.56E-82 | GO:0016072~rRNA metabolic process                                                                    | 4.21E-84 |
| GO:0034470~ncRNA processing                                                                          | 6E-78    | GO:0034470~ncRNA processing                                                                          | 1.94E-82 | GO:0022613~ribonucleoprotein complex biogenesis                                                      | 1.37E-83 |
| GO:0034660~ncRNA metabolic process                                                                   | 1.46E-77 | GO:0034660~ncRNA metabolic process                                                                   | 6.15E-79 | GO:0006364~rRNA processing                                                                           | 3.78E-83 |
| GO:0016072~rRNA metabolic process                                                                    | 9.51E-67 | GO:0006364~rRNA processing                                                                           | 6.77E-75 | GO:0034470~ncRNA processing                                                                          | 3.59E-82 |
| GO:0006364~rRNA processing                                                                           | 1.18E-65 | GO:0016072~rRNA metabolic process                                                                    | 7.69E-74 | GO:0034660~ncRNA metabolic process                                                                   | 2.01E-79 |
| GO:0006396~RNA processing                                                                            | 5.64E-60 | GO:0006396~RNA processing                                                                            | 7.74E-55 | GO:0006396~RNA processing                                                                            | 2.41E-46 |
| GO:0030490~maturation of SSU-rRNA                                                                    | 8.82E-29 | GO:0000462~maturation of SSU-rRNA from tricistronic rRNA transcript (SSU-rRNA, 5.8S rRNA, LSU-rRNA)  | 2.36E-32 | GO:0000462~maturation of SSU-rRNA from tricistronic rRNA transcript (SSU-rRNA, 5.8S rRNA, LSU-rRNA)  | 5.69E-40 |
| GO:0000462~maturation of SSU-rRNA from tricistronic rRNA transcript (SSU-rRNA, 5.8S rRNA, LSU-rRNA)  | 5.83E-28 | GO:0030490~maturation of SSU-rRNA                                                                    | 1.52E-31 | GO:0030490~maturation of SSU-rRNA                                                                    | 9.32E-40 |
| GO:0009451~RNA modification                                                                          | 2.94E-25 | GO:0009451~RNA modification                                                                          | 2.76E-27 | GO:0042255~ribosome assembly                                                                         | 6.6E-28  |
| GO:0000466~maturation of 5.8S rRNA from tricistronic rRNA transcript (SSU-rRNA, 5.8S rRNA, LSU-rRNA) | 2.99E-22 | GO:0042273~ribosomal large subunit biogenesis                                                        | 4E-25    | GO:0042273~ribosomal large subunit biogenesis                                                        | 7.88E-28 |
| GO:0000460~maturation of 5.8S rRNA                                                                   | 2.99E-22 | GO:0000466~maturation of 5.8S rRNA from tricistronic rRNA transcript (SSU-rRNA, 5.8S rRNA, LSU-rRNA) | 1.06E-22 | GO:0000460~maturation of 5.8S rRNA                                                                   | 1.44E-26 |
| GO:0006417~regulation of translation                                                                 | 8.64E-22 | GO:0000460~maturation of 5.8S rRNA                                                                   | 1.06E-22 | GO:0000466~maturation of 5.8S rRNA from tricistronic rRNA transcript (SSU-rRNA, 5.8S rRNA, LSU-rRNA) | 1.44E-26 |
| GO:0042273~ribosomal large subunit biogenesis                                                        | 1.72E-21 | GO:0042255~ribosome assembly                                                                         | 1.06E-22 | GO:0009451~RNA modification                                                                          | 1.23E-23 |
| GO:0032268~regulation of cellular protein metabolic process                                          | 7.25E-20 | GO:0000469~cleavages during rRNA processing                                                          | 2.98E-18 | GO:0042257~ribosomal subunit assembly                                                                | 1.79E-22 |
| GO:0042255~ribosome assembly                                                                         | 2.88E-19 | GO:0042257~ribosomal subunit assembly                                                                | 1.89E-17 | GO:0000469~cleavages during rRNA processing                                                          | 2.31E-20 |
| GO:0000469~cleavages during rRNA processing                                                          | 3.27E-18 | GO:0006417~regulation of translation                                                                 | 3.78E-16 | GO:0000479~endonucleolytic cleavage of tricistronic rRNA transcript (SSU-rRNA, 5.8S rRNA, LSU-rRNA)  | 8.66E-18 |
| GO:0010608~posttranscriptional regulation of gene expression                                         | 6.08E-18 | GO:0022618~ribonucleoprotein complex assembly                                                        | 2.32E-14 | GO:0000478~endonucleolytic cleavages during rRNA processing                                          | 8.66E-18 |
| GO:0006399~tRNA metabolic process                                                                    | 8.97E-17 | GO:0032268~regulation of cellular protein metabolic process                                          | 2.61E-14 | GO:0006417~regulation of translation                                                                 | 3.15E-17 |

|                                                                                                                                                                |          |                                                                                                                                                                |          |                                                                                                                                                                |          |
|----------------------------------------------------------------------------------------------------------------------------------------------------------------|----------|----------------------------------------------------------------------------------------------------------------------------------------------------------------|----------|----------------------------------------------------------------------------------------------------------------------------------------------------------------|----------|
| GO:0022618~ribonucleoprotein complex assembly                                                                                                                  | 8.17E-15 | GO:0000479~endonucleolytic cleavage of tricistronic rRNA transcript (SSU-rRNA, 5.8S rRNA, LSU-rRNA)                                                            | 3.06E-14 | GO:0042274~ribosomal small subunit biogenesis                                                                                                                  | 9.87E-17 |
| GO:0042257~ribosomal subunit assembly                                                                                                                          | 9.2E-15  | GO:0000478~endonucleolytic cleavages during rRNA processing                                                                                                    | 3.06E-14 | GO:0000447~endonucleolytic cleavage in ITS1 to separate SSU-rRNA from 5.8S rRNA and LSU-rRNA from tricistronic rRNA transcript (SSU-rRNA, 5.8S rRNA, LSU-rRNA) | 1.73E-16 |
| GO:0042274~ribosomal small subunit biogenesis                                                                                                                  | 3.89E-13 | GO:0006399~tRNA metabolic process                                                                                                                              | 9.28E-14 | GO:0032268~regulation of cellular protein metabolic process                                                                                                    | 5.09E-16 |
| GO:0006913~nucleocytoplasmic transport                                                                                                                         | 5.77E-13 | GO:0010608~posttranscriptional regulation of gene expression                                                                                                   | 1.89E-13 | GO:0010608~posttranscriptional regulation of gene expression                                                                                                   | 2.13E-15 |
| GO:0051169~nuclear transport                                                                                                                                   | 5.77E-13 | GO:0000447~endonucleolytic cleavage in ITS1 to separate SSU-rRNA from 5.8S rRNA and LSU-rRNA from tricistronic rRNA transcript (SSU-rRNA, 5.8S rRNA, LSU-rRNA) | 1.89E-13 | GO:0008652~cellular amino acid biosynthetic process                                                                                                            | 3.16E-15 |
| GO:0051168~nuclear export                                                                                                                                      | 1.54E-12 | GO:0000027~ribosomal large subunit assembly                                                                                                                    | 1.89E-13 | GO:0000027~ribosomal large subunit assembly                                                                                                                    | 4.65E-15 |
| GO:0000479~endonucleolytic cleavage of tricistronic rRNA transcript (SSU-rRNA, 5.8S rRNA, LSU-rRNA)                                                            | 3.65E-12 | GO:0042274~ribosomal small subunit biogenesis                                                                                                                  | 3.89E-13 | GO:0006412~translation                                                                                                                                         | 1.69E-14 |
| GO:0000478~endonucleolytic cleavages during rRNA processing                                                                                                    | 3.65E-12 | GO:0000966~RNA 5'-end processing                                                                                                                               | 1.13E-09 | GO:0009309~amine biosynthetic process                                                                                                                          | 1.89E-13 |
| GO:0000447~endonucleolytic cleavage in ITS1 to separate SSU-rRNA from 5.8S rRNA and LSU-rRNA from tricistronic rRNA transcript (SSU-rRNA, 5.8S rRNA, LSU-rRNA) | 2.44E-11 | GO:0009309~amine biosynthetic process                                                                                                                          | 1.63E-09 | GO:0022618~ribonucleoprotein complex assembly                                                                                                                  | 1.88E-12 |
| GO:0008033~tRNA processing                                                                                                                                     | 5.56E-11 | GO:0008652~cellular amino acid biosynthetic process                                                                                                            | 1.92E-09 | GO:0046394~carboxylic acid biosynthetic process                                                                                                                | 1.54E-11 |
| GO:0006400~tRNA modification                                                                                                                                   | 3.31E-10 | GO:0006400~tRNA modification                                                                                                                                   | 2.09E-09 | GO:0016053~organic acid biosynthetic process                                                                                                                   | 1.54E-11 |
| GO:0000027~ribosomal large subunit assembly                                                                                                                    | 7.33E-10 | GO:0016032~viral reproduction                                                                                                                                  | 2.17E-09 | GO:0000967~rRNA 5'-end processing                                                                                                                              | 1.02E-10 |
| GO:0034621~cellular macromolecular complex subunit organization                                                                                                | 5.06E-09 | GO:0034471~ncRNA 5'-end processing                                                                                                                             | 3.2E-09  | GO:0034471~ncRNA 5'-end processing                                                                                                                             | 1.02E-10 |
| GO:0000966~RNA 5'-end processing                                                                                                                               | 3.93E-08 | GO:0000967~rRNA 5'-end processing                                                                                                                              | 3.2E-09  | GO:0000472~endonucleolytic cleavage to generate mature 5'-end of SSU-rRNA from (SSU-rRNA, 5.8S rRNA, LSU-rRNA)                                                 | 4.35E-10 |
| GO:0034471~ncRNA 5'-end processing                                                                                                                             | 9.85E-08 | GO:0046797~viral procapsid maturation                                                                                                                          | 5.52E-09 | GO:0000966~RNA 5'-end processing                                                                                                                               | 4.95E-10 |
| GO:0000967~rRNA 5'-end processing                                                                                                                              | 9.85E-08 | GO:0019068~virion assembly                                                                                                                                     | 5.52E-09 | GO:0000480~endonucleolytic cleavage in 5'-ETS of tricistronic rRNA transcript (SSU-rRNA, 5.8S rRNA, LSU-rRNA)                                                  | 7.72E-09 |
| GO:0032774~RNA biosynthetic process                                                                                                                            | 1.48E-07 | GO:0019058~viral infectious cycle                                                                                                                              | 5.52E-09 | GO:0009067~aspartate family amino acid biosynthetic process                                                                                                    | 1.1E-07  |
| GO:0006351~transcription, DNA-dependent                                                                                                                        | 1.51E-07 | GO:0010927~cellular component assembly involved in morphogenesis                                                                                               | 5.52E-09 | GO:0009066~aspartate family amino acid metabolic process                                                                                                       | 3.21E-07 |
| GO:0000472~endonucleolytic cleavage to generate mature                                                                                                         | 2.46E-07 | GO:0019069~viral capsid assembly                                                                                                                               | 5.52E-09 | GO:0044271~nitrogen compound biosynthetic                                                                                                                      | 4.59E-07 |

|                                                                                                               |          |                                                                                                                |          |                                                                                                     |          |
|---------------------------------------------------------------------------------------------------------------|----------|----------------------------------------------------------------------------------------------------------------|----------|-----------------------------------------------------------------------------------------------------|----------|
| 5'-end of SSU-rRNA from (SSU-rRNA, 5.8S rRNA, LSU-rRNA)                                                       |          |                                                                                                                |          | process                                                                                             |          |
| GO:0043144~snoRNA processing                                                                                  | 1.08E-06 | GO:0022415~viral reproductive process                                                                          | 5.52E-09 | GO:0033753~establishment of ribosome localization                                                   | 4.98E-07 |
| GO:0043628~ncRNA 3'-end processing                                                                            | 1.09E-06 | GO:0021700~developmental maturation                                                                            | 5.52E-09 | GO:0000054~ribosome export from nucleus                                                             | 4.98E-07 |
| GO:0016032~viral reproduction                                                                                 | 1.47E-06 | GO:0019067~viral assembly, maturation, egress, and release                                                     | 5.52E-09 | GO:0033750~ribosome localization                                                                    | 4.98E-07 |
| GO:0000480~endonucleolytic cleavage in 5'-ETS of tricistronic rRNA transcript (SSU-rRNA, 5.8S rRNA, LSU-rRNA) | 1.53E-06 | GO:0051168~nuclear export                                                                                      | 8.09E-09 | GO:0051168~nuclear export                                                                           | 7.74E-07 |
| GO:0006350~transcription                                                                                      | 2.01E-06 | GO:0000472~endonucleolytic cleavage to generate mature 5'-end of SSU-rRNA from (SSU-rRNA, 5.8S rRNA, LSU-rRNA) | 9.07E-09 | GO:0006399~tRNA metabolic process                                                                   | 8.26E-07 |
| GO:0043933~macromolecular complex subunit organization                                                        | 2.43E-06 | GO:0015074~DNA integration                                                                                     | 1.47E-08 | GO:0000463~maturation of LSU-rRNA from tricistronic rRNA transcript (SSU-rRNA, 5.8S rRNA, LSU-rRNA) | 1.08E-06 |
| GO:0006412~translation                                                                                        | 2.62E-06 | GO:0008033~tRNA processing                                                                                     | 1.83E-08 | GO:0000470~maturation of LSU-rRNA                                                                   | 1.08E-06 |
| GO:0019068~virion assembly                                                                                    | 3.21E-06 | GO:0006913~nucleocytoplasmic transport                                                                         | 4.78E-08 | GO:0051169~nuclear transport                                                                        | 3.74E-06 |
| GO:0019069~viral capsid assembly                                                                              | 3.21E-06 | GO:0051169~nuclear transport                                                                                   | 4.78E-08 | GO:0006913~nucleocytoplasmic transport                                                              | 3.74E-06 |
| GO:0021700~developmental maturation                                                                           | 3.21E-06 | GO:0000480~endonucleolytic cleavage in 5'-ETS of tricistronic rRNA transcript (SSU-rRNA, 5.8S rRNA, LSU-rRNA)  | 7.24E-08 | GO:0043628~ncRNA 3'-end processing                                                                  | 4.72E-06 |
| GO:0010927~cellular component assembly involved in morphogenesis                                              | 3.21E-06 | GO:0009066~aspartate family amino acid metabolic process                                                       | 1.18E-07 | GO:0000097~sulfur amino acid biosynthetic process                                                   | 1.08E-05 |
| GO:0022415~viral reproductive process                                                                         | 3.21E-06 | GO:0009067~aspartate family amino acid biosynthetic process                                                    | 2.26E-07 | GO:0006400~tRNA modification                                                                        | 2.45E-05 |

### Transiently down-regulated

|                                                     |          |                                                     |          |                                                                |          |
|-----------------------------------------------------|----------|-----------------------------------------------------|----------|----------------------------------------------------------------|----------|
| GO:0007039~vacuolar protein catabolic process       | 4.09E-38 | GO:0030163~protein catabolic process                | 8.61E-45 | GO:0007039~vacuolar protein catabolic process                  | 4E-53    |
| GO:0030163~protein catabolic process                | 2.23E-36 | GO:0044257~cellular protein catabolic process       | 8.64E-44 | GO:0009266~response to temperature stimulus                    | 9.05E-42 |
| GO:0044257~cellular protein catabolic process       | 1.73E-35 | GO:0007039~vacuolar protein catabolic process       | 6.69E-42 | GO:0009408~response to heat                                    | 5.53E-36 |
| GO:0009266~response to temperature stimulus         | 7.17E-29 | GO:0009266~response to temperature stimulus         | 1.61E-32 | GO:0034605~cellular response to heat                           | 3.84E-35 |
| GO:0009628~response to abiotic stimulus             | 4.04E-25 | GO:0009408~response to heat                         | 5.11E-29 | GO:0055114~oxidation reduction                                 | 1.17E-34 |
| GO:0009408~response to heat                         | 6.38E-25 | GO:0034605~cellular response to heat                | 4E-28    | GO:0009628~response to abiotic stimulus                        | 7.29E-31 |
| GO:0034605~cellular response to heat                | 1.11E-22 | GO:0009628~response to abiotic stimulus             | 5.26E-28 | GO:0006091~generation of precursor metabolites and energy      | 2.6E-28  |
| GO:0055114~oxidation reduction                      | 5.25E-18 | GO:0009057~macromolecule catabolic process          | 3.27E-22 | GO:0030163~protein catabolic process                           | 3.11E-25 |
| GO:0009057~macromolecule catabolic process          | 2.33E-17 | GO:0044265~cellular macromolecule catabolic process | 2.14E-21 | GO:0044257~cellular protein catabolic process                  | 3.65E-24 |
| GO:0044265~cellular macromolecule catabolic process | 2.6E-16  | GO:0006914~autophagy                                | 6.15E-20 | GO:0015980~energy derivation by oxidation of organic compounds | 5.76E-22 |
| GO:0006914~autophagy                                | 1.22E-14 | GO:0007005~mitochondrion organization               | 5.76E-19 | GO:0009057~macromolecule catabolic process                     | 8.98E-15 |

|                                                                       |          |                                                                       |          |                                                                   |          |
|-----------------------------------------------------------------------|----------|-----------------------------------------------------------------------|----------|-------------------------------------------------------------------|----------|
| GO:0006091~generation of precursor metabolites and energy             | 1.24E-14 | GO:0055114~oxidation reduction                                        | 1.03E-17 | GO:0044265~cellular macromolecule catabolic process               | 1.89E-13 |
| GO:0015980~energy derivation by oxidation of organic compounds        | 1.28E-14 | GO:0015980~energy derivation by oxidation of organic compounds        | 6.72E-16 | GO:0045333~cellular respiration                                   | 5.55E-13 |
| GO:0006508~proteolysis                                                | 1.31E-11 | GO:0006091~generation of precursor metabolites and energy             | 1.64E-14 | GO:0005996~monosaccharide metabolic process                       | 1.11E-12 |
| GO:0051603~proteolysis involved in cellular protein catabolic process | 1.54E-09 | GO:0051603~proteolysis involved in cellular protein catabolic process | 6.36E-14 | GO:0006119~oxidative phosphorylation                              | 2.41E-12 |
| GO:0019941~modification-dependent protein catabolic process           | 5.56E-08 | GO:0006508~proteolysis                                                | 1.34E-12 | GO:0033554~cellular response to stress                            | 2.6E-12  |
| GO:0006511~ubiquitin-dependent protein catabolic process              | 2.76E-07 | GO:0019941~modification-dependent protein catabolic process           | 6.53E-12 | GO:0019318~hexose metabolic process                               | 6.29E-12 |
| GO:0045333~cellular respiration                                       | 8.84E-07 | GO:0006511~ubiquitin-dependent protein catabolic process              | 3.84E-11 | GO:0006006~glucose metabolic process                              | 5.01E-10 |
| GO:0006112~energy reserve metabolic process                           | 2.79E-05 | GO:0045333~cellular respiration                                       | 5.07E-09 | GO:0044275~cellular carbohydrate catabolic process                | 2.43E-09 |
| GO:0043632~modification-dependent macromolecule catabolic process     | 3.59E-05 | GO:0043632~modification-dependent macromolecule catabolic process     | 1.52E-08 | GO:0016052~carbohydrate catabolic process                         | 4.66E-09 |
| GO:0009060~aerobic respiration                                        | 3.63E-05 | GO:0016044~membrane organization                                      | 2.28E-08 | GO:0006914~autophagy                                              | 4.96E-09 |
| GO:0006084~acetyl-CoA metabolic process                               | 5.38E-05 | GO:0009060~aerobic respiration                                        | 9.01E-08 | GO:0042775~mitochondrial ATP synthesis coupled electron transport | 5.35E-09 |
| GO:0033554~cellular response to stress                                | 6.77E-05 | GO:0006112~energy reserve metabolic process                           | 7.09E-06 | GO:0042773~ATP synthesis coupled electron transport               | 5.35E-09 |
| GO:0019318~hexose metabolic process                                   | 6.82E-05 | GO:0005984~disaccharide metabolic process                             | 1.08E-05 | GO:0009060~aerobic respiration                                    | 5.71E-09 |
| GO:0005996~monosaccharide metabolic process                           | 0.000117 | GO:0007034~vacuolar transport                                         | 1.2E-05  | GO:0051186~cofactor metabolic process                             | 1.15E-08 |
| GO:0007005~mitochondrion organization                                 | 0.000166 | GO:0033554~cellular response to stress                                | 1.52E-05 | GO:0006099~tricarboxylic acid cycle                               | 4.73E-08 |
| GO:0016044~membrane organization                                      | 0.000203 | GO:0032543~mitochondrial translation                                  | 6.17E-05 | GO:0046356~acetyl-CoA catabolic process                           | 4.73E-08 |
| GO:0006119~oxidative phosphorylation                                  | 0.000219 | GO:0030435~sporulation resulting in formation of a cellular spore     | 9.98E-05 | GO:0008219~cell death                                             | 6.82E-08 |
| GO:0008219~cell death                                                 | 0.000315 | GO:0043934~sporulation                                                | 9.98E-05 | GO:0016265~death                                                  | 6.82E-08 |
| GO:0016265~death                                                      | 0.000315 | GO:0009991~response to extracellular stimulus                         | 0.000101 | GO:0006084~acetyl-CoA metabolic process                           | 1.72E-07 |
| GO:0007034~vacuolar transport                                         | 0.000824 | GO:0033108~mitochondrial respiratory chain complex assembly           | 0.000159 | GO:0009109~coenzyme catabolic process                             | 1.72E-07 |
| GO:0016310~phosphorylation                                            | 0.000924 | GO:0051186~cofactor metabolic process                                 | 0.000189 | GO:0016310~phosphorylation                                        | 2.58E-07 |
| GO:0006006~glucose metabolic process                                  | 0.000988 | GO:0006623~protein targeting to vacuole                               | 0.000203 | GO:0022904~respiratory electron transport chain                   | 3.13E-07 |
| GO:0051186~cofactor metabolic process                                 | 0.001352 | GO:0031667~response to nutrient levels                                | 0.000392 | GO:0051187~cofactor catabolic process                             | 3.96E-07 |
| GO:0006099~tricarboxylic acid cycle                                   | 0.001522 | GO:0010324~membrane invagination                                      | 0.000498 | GO:0046365~monosaccharide catabolic process                       | 5.85E-07 |
| GO:0046356~acetyl-CoA catabolic process                               | 0.001522 | GO:0031668~cellular response to extracellular stimulus                | 0.000805 | GO:0006793~phosphorus metabolic process                           | 8.16E-07 |
| GO:0006732~coenzyme metabolic process                                 | 0.001581 | GO:0006084~acetyl-CoA metabolic process                               | 0.000878 | GO:0022900~electron transport chain                               | 1.1E-06  |
| GO:0009991~response to extracellular stimulus                         | 0.001766 | GO:0016265~death                                                      | 0.001659 | GO:0006732~coenzyme metabolic process                             | 1.32E-06 |
| GO:0006793~phosphorus                                                 | 0.00202  | GO:0008219~cell death                                                 | 0.00165  | GO:0046164~alcohol                                                | 1.35E-   |



|                                                                   |              |                                                 |              |                                                        |              |
|-------------------------------------------------------------------|--------------|-------------------------------------------------|--------------|--------------------------------------------------------|--------------|
| metabolic process                                                 | 5            |                                                 | 9            | catabolic process                                      | 06           |
| GO:0009109~coenzyme catabolic process                             | 0.00253      | GO:0016310~phosphorylation                      | 0.00222<br>1 | GO:0006112~energy reserve metabolic process            | 7.09E-06     |
| GO:0007031~peroxisome organization                                | 0.00296<br>4 | GO:0031669~cellular response to nutrient levels | 0.00306<br>3 | GO:0019320~hexose catabolic process                    | 1.26E-05     |
| GO:0006623~protein targeting to vacuole                           | 0.00329<br>4 | GO:0007031~peroxisome organization              | 0.00335<br>6 | GO:0006796~phosphate metabolic process                 | 2.52E-05     |
| GO:0010324~membrane invagination                                  | 0.00418<br>2 | GO:0006099~tricarboxylic acid cycle             | 0.00382      | GO:0005984~disaccharide metabolic process              | 3.54E-05     |
| GO:0016052~carbohydrate catabolic process                         | 0.00426<br>9 | GO:0046356~acetyl-CoA catabolic process         | 0.00382      | GO:0006007~glucose catabolic process                   | 9.75E-05     |
| GO:0044275~cellular carbohydrate catabolic process                | 0.00510<br>4 | GO:0006732~coenzyme metabolic process           | 0.00467      | GO:0005978~glycogen biosynthetic process               | 0.00063      |
| GO:0048308~organelle inheritance                                  | 0.00581<br>6 | GO:0009109~coenzyme catabolic process           | 0.00510<br>2 | GO:0006733~oxidoreduction coenzyme metabolic process   | 0.00116<br>2 |
| GO:0031667~response to nutrient levels                            | 0.00595<br>2 | GO:0006793~phosphorus metabolic process         | 0.00617      | GO:0031668~cellular response to extracellular stimulus | 0.00222<br>8 |
| GO:0051187~cofactor catabolic process                             | 0.00649<br>5 | GO:0042594~response to starvation               | 0.00678<br>3 | GO:0016054~organic acid catabolic process              | 0.00265<br>3 |
| GO:0042773~ATP synthesis coupled electron transport               | 0.00773<br>3 | GO:0016197~endosome transport                   | 0.00946<br>3 | GO:0046395~carboxylic acid catabolic process           | 0.00265<br>3 |
| GO:0042775~mitochondrial ATP synthesis coupled electron transport | 0.00773<br>3 | GO:0006119~oxidative phosphorylation            | 0.01065<br>4 | GO:0009991~response to extracellular stimulus          | 0.00652<br>5 |

**Table S2:** List of mutants that were tested based on RNA-seq data (see the text). The list contains deletion of genes with high up-regulation in earliest time point (30 min) and genes with key role in osmotic stress response. Performance of these mutants during dough fermentation was tested to investigate the importance of the genes for proper dough fermentation. Note that mutants with impaired growth or fermentation on standard rich medium (YPD) were excluded from study.

| Mutant                    | Gene Systematic Name | Gene Name Description                 |
|---------------------------|----------------------|---------------------------------------|
| <i>Δhog1*</i>             | YLR113W              | High Osmolarity Glycerol response     |
| <i>Δhot1*</i>             | YMR172W              | High-Osmolarity-induced Transcription |
| <i>Δpbs2*</i>             | YJL128C              | Polymyxin B Sensitivity               |
| <i>Δsho1*</i>             | YER118C              | Transmembrane osmosensor              |
| <i>Δste20*</i>            | YHL007C              | STERile                               |
| <i>Δgpp1*<sup>^</sup></i> | YIL053W              | glycerol-1-phosphatase                |
| <i>Δgpp2*<sup>^</sup></i> | YER062C              | Glycerol-1-phosphatase                |
| <i>Δstl1*<sup>^</sup></i> | YDR536W              | Sugar Transporter-Like protein        |
| <i>Δgpd1*<sup>^</sup></i> | YDL022W              | Glycerol-3-Phosphate Dehydrogenase    |
| <i>Δgre2*<sup>^</sup></i> | YOL151W              | Stress responsive gene                |
| <i>Δfsf1<sup>^</sup></i>  | YOR271C              | Fungal SideroFlexin                   |
| <i>Δfre4<sup>^</sup></i>  | YNR060W              | Ferric REDuctase                      |
| <i>Δaqr1<sup>^</sup></i>  | YNL065W              | Acids Quinidine Resistance            |
| <i>Δari1<sup>^</sup></i>  | YGL157W              | Aldehyde Reductase Intermediate       |
| <i>Δstd1<sup>^</sup></i>  | YOR047C              | Suppressor of Tbp Deletion            |
| <i>Δsul2<sup>^</sup></i>  | YLR092W              | SULfate metabolism                    |
| <i>Δaco2<sup>^</sup></i>  | YJL200C              | ACOnitase                             |
| <i>Δhlr1<sup>^</sup></i>  | YDR528W              | Homologue of LRe1                     |
| <i>Δctp1<sup>^</sup></i>  | YBR291C              | Citrate Transport Protein             |

\*The gene is regulated by HOG pathway

<sup>^</sup> The gene was highly up-regulated at earliest time point
